# Supplementary material
Source: PubMed Central journal article supplement (PMC4918444)
Supplement: ismej2015237x1.pdf [file ismej2015237x1.pdf]

# Supplementary Information

Hahn, M.W., Jezberová, J., Koll, U., Saueressig-Beck, T., and J. Schmidt.

**Complete ecological isolation and cryptic diversity in *Polynucleobacter* bacteria not resolved by 16S rRNA gene sequences**

**The ISME Journal**

**Suppl. Mat. Table S1.** Strains, their affiliation with *Polynucleobacter* lineages, and accession numbers for ribosomal and genome sequences. ND, not determined

| Strain         | Lineage <sup>§</sup> | Habitat of Origin       | Type of Habitat               | Accession number    |          |          | Reference                            |
|----------------|----------------------|-------------------------|-------------------------------|---------------------|----------|----------|--------------------------------------|
|                |                      |                         |                               | SSU rRNA and/or ITS | glnA     | Genome   |                                      |
| QLW-P1DMWA-1   | F10                  | Pond-1                  | acidic pond                   | AJ879783            | FN823098 | CP000655 | (Hahn et al 2005); (Hahn et al 2012) |
| P1-05-13       | F10                  | Pond-1                  | acidic pond                   | HE646561            | HE646447 | ND       | (Hahn et al 2012)                    |
| MWH-RechtKolB  | F10                  | Pond Rechteckteich      | acidic pond                   | FN429668            | FN823145 | ND       | (Jezbera et al 2011)                 |
| QLW-P1FAT50C-4 | F4                   | Pond-1                  | acidic pond                   | AJ879778            | FN823104 | ND       | (Hahn et al 2005)                    |
| QLW-P1DATA-2   | F5                   | Pond-1                  | acidic pond                   | AJ879801            | FN823102 | ND       | (Hahn et al 2005)                    |
| MWH-UK1W16     | F15                  | Lake Unterer Klaffersee | circum-neutral softwater lake | AM110086            | FN823097 | ND       | (Jezbera et al 2011)                 |
| MWH-MoK4       | F17                  | Lake Mondsee            | alkaline hardwater lake       | AJ550654            | FN823084 | CP007501 | (Hahn 2003)                          |
| MWH-MoK7       | F17                  | Lake Mondsee            | alkaline hardwater lake       | AJ550673            | FN823083 | ND       | (Hahn 2003)                          |
| MWH-Molso1     | - <sup>§§</sup>      | Lake Mondsee            | alkaline hardwater lake       | AJ550671            | FN823082 | ND       | (Hahn 2003)                          |

<sup>§</sup> presence of a diagnostic lineage-specific sequence in the 16S-23S ITS

<sup>§§</sup> closely related to lineage F17 but lacking the diagnostic sequence identifying F17 strains

**Supplementary Materials Table S2.** Parameters characterizing the habitats of origin of strains compared in ecophysiological experiments, as well as the garden pond used for two transplantation experiments. The mentioned detections refer to investigations using a cultivation independent method (Jezbera et al 2011).

| Parameter                              | Lake Mondsee       | Garden pond         | Pond-1              |
|----------------------------------------|--------------------|---------------------|---------------------|
| Geographic coordinates                 | N 47.841° E13.367° | N 47.861° E 13.340° | N 47.740° E 13.302° |
| pH                                     | 8.6                | 7.8                 | 5.2                 |
| Conductivity ( $\mu\text{S cm}^{-1}$ ) | 306                | 190                 | 8.6                 |
| F10 lineage detected                   | -                  | -                   | +                   |
| F17 lineage detected                   | +                  | +                   | -                   |

**Suppl. Mat. Table S3.** Compared *Polynucleobacter* genomes. The genome sequence of Beta proteobacterium SCGC AAA027-C02 was obtained by single cell genome sequencing and represents most likely an incomplete genome. The genome of the obligately endosymbiotic strain STIR1 is known for erosive genome evolution (Boscaro et al 2013).

| Strain                                                   | DNA scaffolds | Genome Size (Mbp) | Gene Count | GC (%) | RefSeq / IMG Genome ID | Reference             |
|----------------------------------------------------------|---------------|-------------------|------------|--------|------------------------|-----------------------|
| <i>Polynucleobacter</i> QLW-P1DMWA-1                     | 1             | 2.16              | 2136       | 45     | NC_009379.1            | (Meincke et al 2012)  |
| <i>Polynucleobacter</i> MWH-MoK4                         | 1             | 2.03              | 2107       | 45     | NZ_CP007501.1          | This study            |
| Beta proteobacterium CB                                  | 1             | 2.05              | 2152       | 46     | NC_020417.1            | (Hao et al 2013)      |
| <i>Polynucleobacter necessarius</i> STIR1 (Endosymbiont) | 1             | 1.56              | 1782       | 46     | NC_010531.1            | (Boscaro et al 2013)  |
| <i>Polynucleobacter</i> sp. FNE-F8                       | 20            | 2.33              | 2394       | 45     | 2596583565             | (Garcia et al 2013)   |
| Beta proteobacterium SCGC AAA027-C02                     | 63            | 1.30              | 1444       | 44     | NZ_ATZV00000000.1      | (Tatusova et al 2014) |

**Supplementary Materials Figure S1.** 16S rRNA gene tree depicting the phylogenetic position of the six genome-sequenced PncC strains (see Suppl. Mat. Table S3).

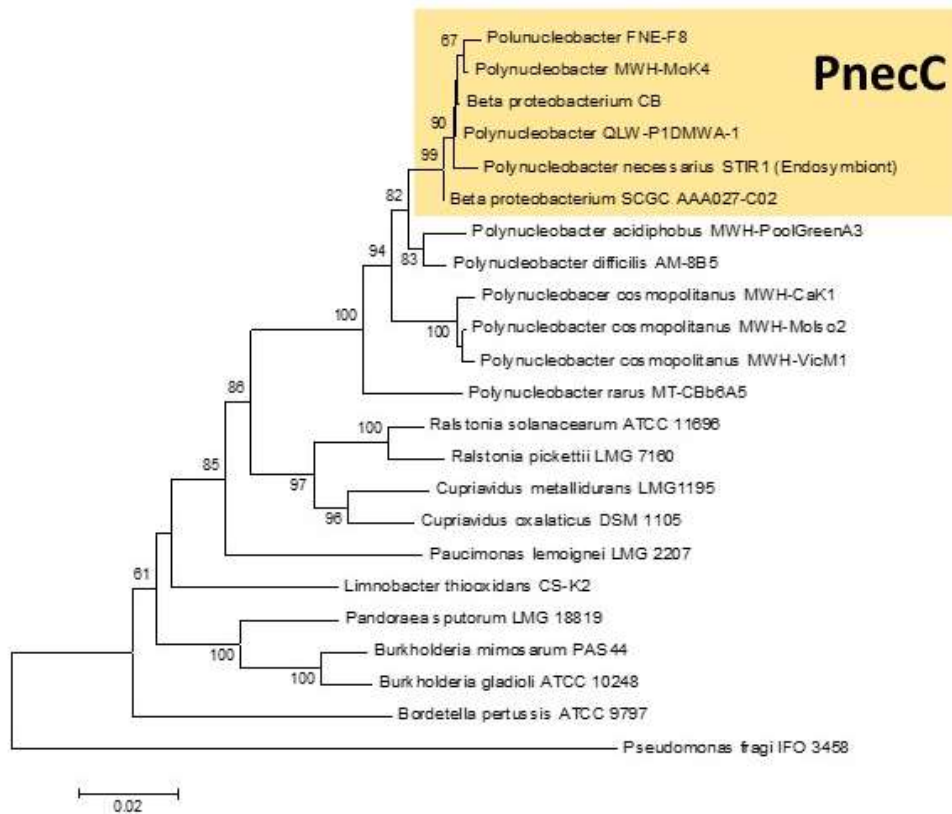

**Supplementary Materials Figure S2.** Detection of *feoB* ( $\text{Fe}^{2+}$ ) and ABC type  $\text{Fe}^{3+}$  transporter genes (*fpbB*) in PncC strains isolated from habitats differing in pH values by PCR.

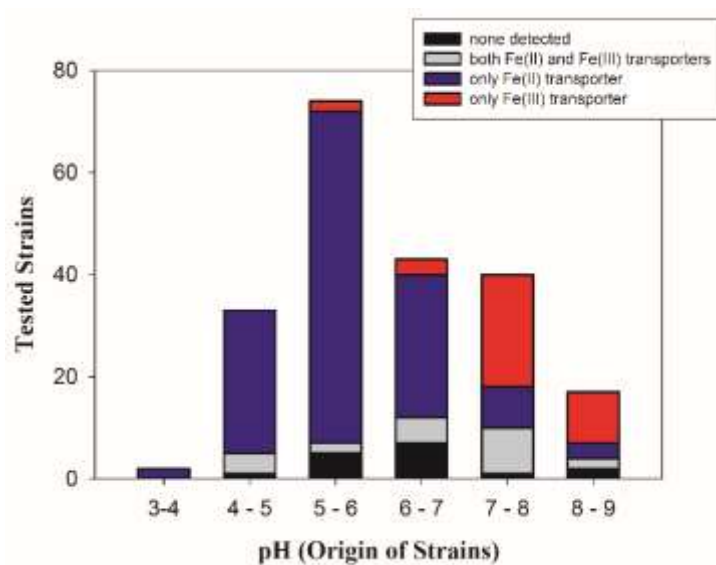

## References

- Boscaro V, Felletti M, Vannini C, Ackerman MS, Chain PSG, Malfatti S *et al* (2013). *Polynucleobacter necessarius*, a model for genome reduction in both free-living and symbiotic bacteria. *Proceedings of the National Academy of Sciences of the United States of America* **110**: 18590-18595.
- Garcia SL, McMahon KD, Martinez-Garcia M, Srivastava A, Sczyrba A, Stepanauskas R *et al* (2013). Metabolic potential of a single cell belonging to one of the most abundant lineages in freshwater bacterioplankton. *ISME Journal* **7**: 137-147.
- Hahn MW (2003). Isolation of strains belonging to the cosmopolitan *Polynucleobacter necessarius* cluster from freshwater habitats located in three climatic zones. *Applied and Environmental Microbiology* **69**: 5248-5254.
- Hahn MW, Pockl M, Wu QL (2005). Low intraspecific diversity in a *Polynucleobacter* subcluster population numerically dominating bacterioplankton of a freshwater pond. *Applied and Environmental Microbiology* **71**: 4539-4547.
- Hahn MW, Scheuerl T, Jezberova J, Koll U, Jezbera J, Simek K *et al* (2012). The passive yet successful way of planktonic life: Genomic and experimental analysis of the ecology of a free-living *Polynucleobacter* population. *Plos One* **7**.
- Hao Z, Li L, Liu J, Ren Y, Wang L, Bartlam M *et al* (2013). Genome sequence of a freshwater low-nucleic-acid-content bacterium, Betaproteobacterium strain CB. *Genome announcements* **1**: e0013513-e0013513.
- Jezbera J, Jezberova J, Brandt U, Hahn MW (2011). Ubiquity of *Polynucleobacter necessarius* subspecies *asymbioticus* results from ecological diversification. *Environmental Microbiology* **13**: 922-931.
- Meincke L, Copeland A, Lapidus A, Lucas S, Berry KW, Del Rio TG *et al* (2012). Complete genome sequence of *Polynucleobacter necessarius* subsp. *asymbioticus* type strain (QLW-P1DMWA-1<sup>T</sup>). *Standards in Genomic Sciences* **6**: 74-83.
- Tatusova T, Ciufu S, Fedorov B, O'Neill K, Tolstoy I (2014). RefSeq microbial genomes database: new representation and annotation strategy. *Nucleic Acids Res* **42**: D553-559.
